# Supplementary material for: Tetrabromobenzene-based molecular alloys – a tool for tailoring the temperature of the thermosalient phase transition
Source: Royal Society of Chemistry journal article supplement (doi:10.1039/d4tc04615c), 2025-01-01
Supplement: d4tc04615c1.pdf [file d4tc04615c1.pdf]

# Tetrabromobenzene-based molecular alloys – a tool for tailoring the temperature of the thermosalient phase transition

Teodoro Klaser,<sup>a,b</sup> Oskar Stepančić,<sup>a,c</sup> Jasminka Popović,<sup>d</sup> Jana Pisk,<sup>e</sup> Luka Pavić,<sup>d</sup> Igor Picek,<sup>f</sup> Dubravka Matković-Čalogović<sup>e</sup> and Željko Skoko<sup>a,\*</sup>

<sup>a</sup> Department of Physics, Faculty of Science, University of Zagreb, Bijenička 32, Zagreb, Croatia

<sup>b</sup> Department of Physics, University of Trento, Via Sommarive 14, Trento, Italy

<sup>c</sup> Department of Physics, Division of Synchrotron Radiation Research, Lund University, Sweden

<sup>d</sup> Ruder Bošković Institute, Bijenička 54, Zagreb, Croatia

<sup>e</sup> Department of Chemistry, Faculty of Science, University of Zagreb, Horvatovac 102a, Zagreb, Croatia

<sup>f</sup> Department of Chemistry and Biochemistry, School of Medicine, University of Zagreb, Šalata 3, Zagreb, Croatia

\* Corresponding author: Željko Skoko [zskoko@phy.hr](mailto:zskoko@phy.hr)

## SUPPLEMENTARY INFORMATION

**Table S1.** Elemental analysis by EDS of TBB-TCB molecular alloys

| Sample        | Ratio Br(wt%)/Cl(wt%)<br>(nominal composition) | Ratio Br(wt%)/Cl(wt%)<br>(determined by EDS) |
|---------------|------------------------------------------------|----------------------------------------------|
| 76%TBB-24%TCB | 3.88                                           | 3.23                                         |
| 80%TBB-20%TCB | 4.94                                           | 4.11                                         |
| 84%TBB-16%TCB | 6.49                                           | 5.29                                         |
| 88%TBB-12%TCB | 8.88                                           | 6.97                                         |
| 90%TBB-10%TCB | 11.12                                          | 9.47                                         |
| 92%TBB-8%TCB  | 14.21                                          | 11.33                                        |
| 94%TBB-6%TCB  | 19.36                                          | 14.80                                        |
| 95%TBB-5%TCB  | 23.48                                          | 19.20                                        |
| 96%TBB-4%TCB  | 29.00                                          | 25.40                                        |
| 98%TBB-2%TCB  | 60.56                                          | 65.67                                        |

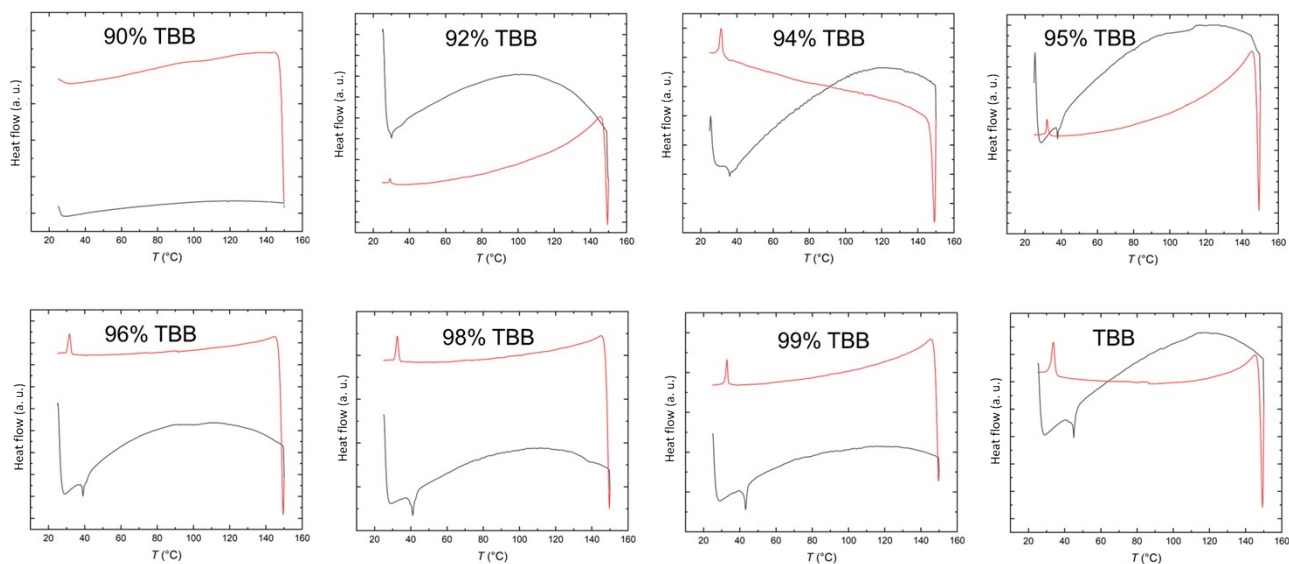

**Fig S1** DSC curves of samples with 90% - 100% wt% TBB during the heating run and cooling runs.

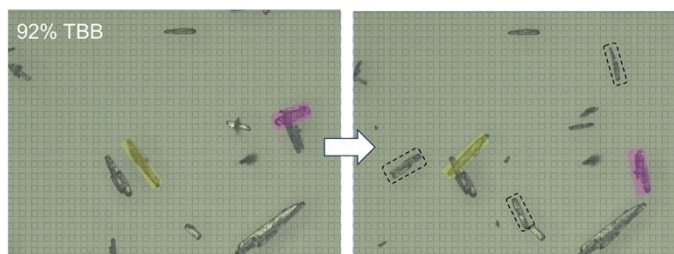

**Fig S2** Hot-stage microscopy screenshots prior and after the thermosalient phase transition from RT  $\beta$ -phase to HT  $\gamma$ -phase for sample with 92% TBB. Dashed lines represent crystals that have jumped into the frame. Crystals that jumped and remained inside the frame are coloured in blue, yellow, pink, green, orange and purple.

**Table S2.** Crystal data and structure refinement for  $C_6H_2Br_{3.86}Cl_{0.14}$ .

|                                                |                                                            |
|------------------------------------------------|------------------------------------------------------------|
| Identification code                            | 98 wt.% TBB – 2 wt.% TCB                                   |
| CCDC Deposition Number                         | 2393428                                                    |
| Empirical formula                              | $C_6H_2Br_{3.86}Cl_{0.14}$                                 |
| Formula weight                                 | 387.27                                                     |
| Temperature/K                                  | 293(2)                                                     |
| Crystal system                                 | monoclinic                                                 |
| Space group                                    | $P2_1/n$                                                   |
| a/Å                                            | 4.0201(14)                                                 |
| b/Å                                            | 10.706(3)                                                  |
| c/Å                                            | 10.245(2)                                                  |
| $\alpha/^\circ$                                | 90                                                         |
| $\beta/^\circ$                                 | 100.13(3)                                                  |
| $\gamma/^\circ$                                | 90                                                         |
| Volume/Å <sup>3</sup>                          | 434.1(2)                                                   |
| Z                                              | 2                                                          |
| $\rho_{calc}/cm^3$                             | 2.963                                                      |
| $\mu/mm^{-1}$                                  | 18.119                                                     |
| F(000)                                         | 351.0                                                      |
| Crystal size/mm <sup>3</sup>                   | 0.49 × 0.16 × 0.15                                         |
| Radiation                                      | MoK $\alpha$ ( $\lambda = 0.71073$ )                       |
| 2 $\theta$ range for data collection/ $^\circ$ | 8.62 to 55.988                                             |
| Index ranges                                   | $-3 \leq h \leq 5, -12 \leq k \leq 14, -13 \leq l \leq 13$ |
| Reflections collected                          | 1922                                                       |
| Independent reflections                        | 1030 [ $R_{int} = 0.0885, R_{sigma} = 0.1418$ ]            |
| Data/restraints/parameters                     | 1030/20/64                                                 |
| Goodness-of-fit on $F^2$                       | 0.952                                                      |
| Final R indexes [ $ I  \geq 2\sigma(I)$ ]      | $R_1 = 0.0672, wR_2 = 0.0904$                              |
| Final R indexes [all data]                     | $R_1 = 0.1275, wR_2 = 0.1127$                              |
| Largest diff. peak/hole / e Å <sup>-3</sup>    | 0.80/-0.88                                                 |

**Table S3.** Bond lengths for  $C_6H_2Br_{3.86}Cl_{0.14}$

| Atom | Atom            | Length/Å  | Atom | Atom | Length/Å  |
|------|-----------------|-----------|------|------|-----------|
| C1   | C2              | 1.390(14) | C2   | C3   | 1.378(14) |
| C1   | C3 <sup>1</sup> | 1.399(13) | C2   | Br2  | 1.868(10) |
| C1   | Br1             | 1.897(11) | C2   | Cl2  | 1.722(12) |

|    |     |           |
|----|-----|-----------|
| C1 | Cl1 | 1.722(12) |
|----|-----|-----------|

<sup>1</sup>-X,1-Y,2-Z

**Table S4.** Bond angles for C<sub>6</sub>H<sub>2</sub>Br<sub>3.86</sub>Cl<sub>0.14</sub>

| Atom            | Atom | Atom            | Angle/°  | Atom | Atom | Atom            | Angle/°  |
|-----------------|------|-----------------|----------|------|------|-----------------|----------|
| C2              | C1   | C3 <sup>1</sup> | 121.2(1) | C1   | C2   | Cl2             | 122.3(1) |
| C2              | C1   | Br1             | 120.4(8) | C3   | C2   | C1              | 118.5(9) |
| C2              | C1   | Cl1             | 120.8(1) | C3   | C2   | Br2             | 118.2(8) |
| C3 <sup>1</sup> | C1   | Br1             | 118.3(8) | C3   | C2   | Cl2             | 119.3(2) |
| C3 <sup>1</sup> | C1   | Cl1             | 118.0(2) | Cl2  | C2   | Br2             | 1.1(1)   |
| Cl1             | C1   | Br1             | 1(2)     | C2   | C3   | C1 <sup>1</sup> | 120.3(9) |
| C1              | C2   | Br2             | 123.3(9) |      |      |                 |          |

<sup>1</sup>-X,1-Y,2-Z

**Table S5.** Torsion angles for C<sub>6</sub>H<sub>2</sub>Br<sub>3.86</sub>Cl<sub>0.14</sub>

| A               | B  | C  | D               | Angle/°   | A   | B  | C  | D               | Angle/°   |
|-----------------|----|----|-----------------|-----------|-----|----|----|-----------------|-----------|
| C1              | C2 | C3 | C1 <sup>1</sup> | 0.7(1)    | Br1 | C1 | C2 | Cl2             | 1(3)      |
| C3 <sup>1</sup> | C1 | C2 | C3              | -0.7(1)   | Br2 | C2 | C3 | C1 <sup>1</sup> | -179.9(7) |
| C3 <sup>1</sup> | C1 | C2 | Br2             | 179.9(7)  | Cl2 | C2 | C3 | C1 <sup>1</sup> | -180(3)   |
| C3 <sup>1</sup> | C1 | C2 | Cl2             | 180(3)    | Cl1 | C1 | C2 | C3              | 180(2)    |
| Br1             | C1 | C2 | C3              | -179.4(7) | Cl1 | C1 | C2 | Br2             | 0(3)      |
| Br1             | C1 | C2 | Br2             | 0.9(1)    | Cl1 | C1 | C2 | Cl2             | 0(3)      |

<sup>1</sup>-X,1-Y,2-Z

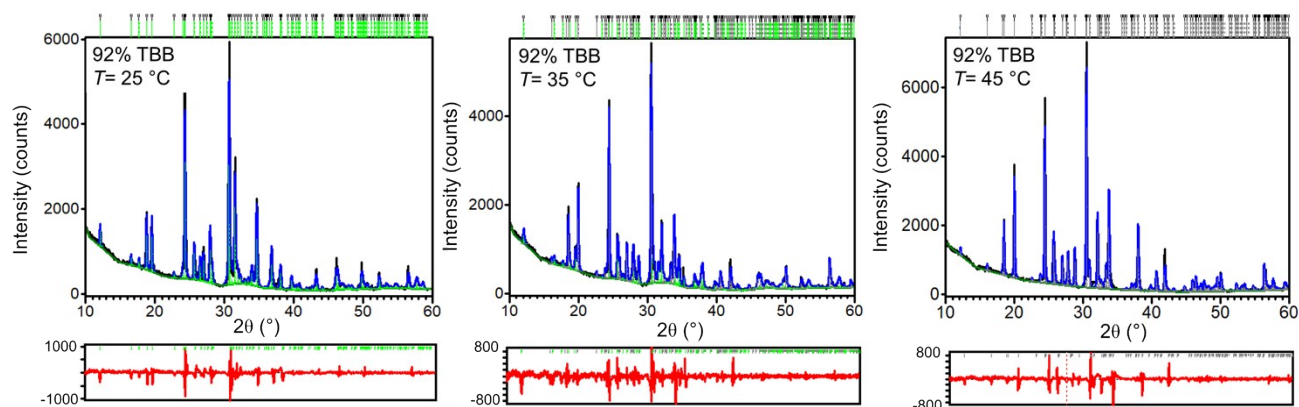

**Fig S3** Refinement of the molecular alloy with 92 wt.% TBB at 25, 35 and 45 °C. Experimental *in-situ* XRPD data are given as black lines, calculated profile in blue while the difference is given in red below. Green vertical lines mark the positions of reflections belonging to the RT β-phase while the positions of HT γ-phase reflections are shown in grey.

**Table S6.** Principal axes X, Y, Z; coefficients of linear thermal expansion along principal axes; normalised components of the principal axes

| TTB 92% | LT form               |        |     |         | HT form               |        |     |        |
|---------|-----------------------|--------|-----|---------|-----------------------|--------|-----|--------|
|         | α (MK <sup>-1</sup> ) | a      | b   | c       | α (MK <sup>-1</sup> ) | a      | b   | c      |
| X       | -311                  | 0.522  | 0.0 | 0.853   | -212                  | 0.4387 | 0.0 | 0.8987 |
| Y       | 190                   | 1.0    | 0.0 | 0.0098  | 209                   | 9.9999 | 0.0 | 0.0118 |
| Z       | 243                   | 0      | 1   | 0       | 323                   | 0      | 1   | 0      |
| Volume  | 121                   |        |     |         | 317                   |        |     |        |
| TTB 98% | LT form               |        |     |         | HT form               |        |     |        |
|         | α (MK <sup>-1</sup> ) | a      | b   | c       | α (MK <sup>-1</sup> ) | a      | b   | c      |
| X       | -374                  | 0.5634 | 0.0 | 0.8262  | -217                  | 0.5067 | 0.0 | 0.8621 |
| Y       | 175                   | 0.9998 | 0.0 | -0.0216 | 191                   | 1.0    | 0.0 | -0.006 |
| Z       | 366                   | 0.0    | 1.0 | 0.0     | 293                   | 0.0    | 1.0 | 0.0    |
| Volume  | 167                   |        |     |         | 267                   |        |     |        |

| TTB 100% | LT form |        |     |        | HT form |        |     |         |
|----------|---------|--------|-----|--------|---------|--------|-----|---------|
| X        | -341    | 0.6759 | 0.0 | 0.737  | -198    | 0.6522 | 0.0 | 0.7581  |
| Y        | 203     | 0.9982 | 0.0 | -0.606 | 213     | 0.9985 | 0.0 | -0.0554 |
| Z        | 388     | 0.0    | 1.0 | 0.0    | 311     | 0.0    | 1.0 | 0.0     |
| Volume   | 250     |        |     |        | 326     |        |     |         |

**Video S1.** Video of the sample 92%TBB-8%TCB during heating.

**Video S2.** Video of the sample 92%TBB-8%TCB during cooling.

**Video S3.** Video of the sample 98%TBB-2%TCB during heating.

**Video S4.** Video of the sample 98%TBB-2%TCB during cooling.
